# Supplementary material for: Mannan-induced Nos2 in macrophages enhances IL-17–driven psoriatic arthritis by innate lymphocytes
Source: PubMed Central journal article supplement — Sci Adv. 2018 May 16;4(5):eaas9864. doi: 10.1126/sciadv.aas9864 (PMC5955621; doi:10.1126/sciadv.aas9864), 2018-05-16
Supplement: aas9864_SM.pdf [file aas9864_SM.pdf]

## Supplementary Materials for **Mannan-induced Nos2 in macrophages enhances IL-17–driven psoriatic arthritis by innate lymphocytes**

Jianghong Zhong, Tatjana Scholz, Anthony C. Y. Yau, Simon Guerard, Ulrike Hüffmeier, Harald Burkhardt, Rikard Holmdahl

Published 16 May 2018, *Sci. Adv.* **4**, eaas9864 (2018)  
DOI: 10.1126/sciadv.aas9864

### **This PDF file includes:**

- fig. S1. Representative flow cytometry gating scheme for NOS2 expression analysis in human IFN- $\gamma$ /LPS–activated MDSCs and in vitro–differentiated TIP DCs.
- fig. S2. Representative flow cytometry gating scheme for skin ILC3 analysis at the paw.
- fig. S3. Representative flow cytometry gating scheme for skin  $\gamma\delta$  T cells analysis at the paw.

## Supplementary Materials

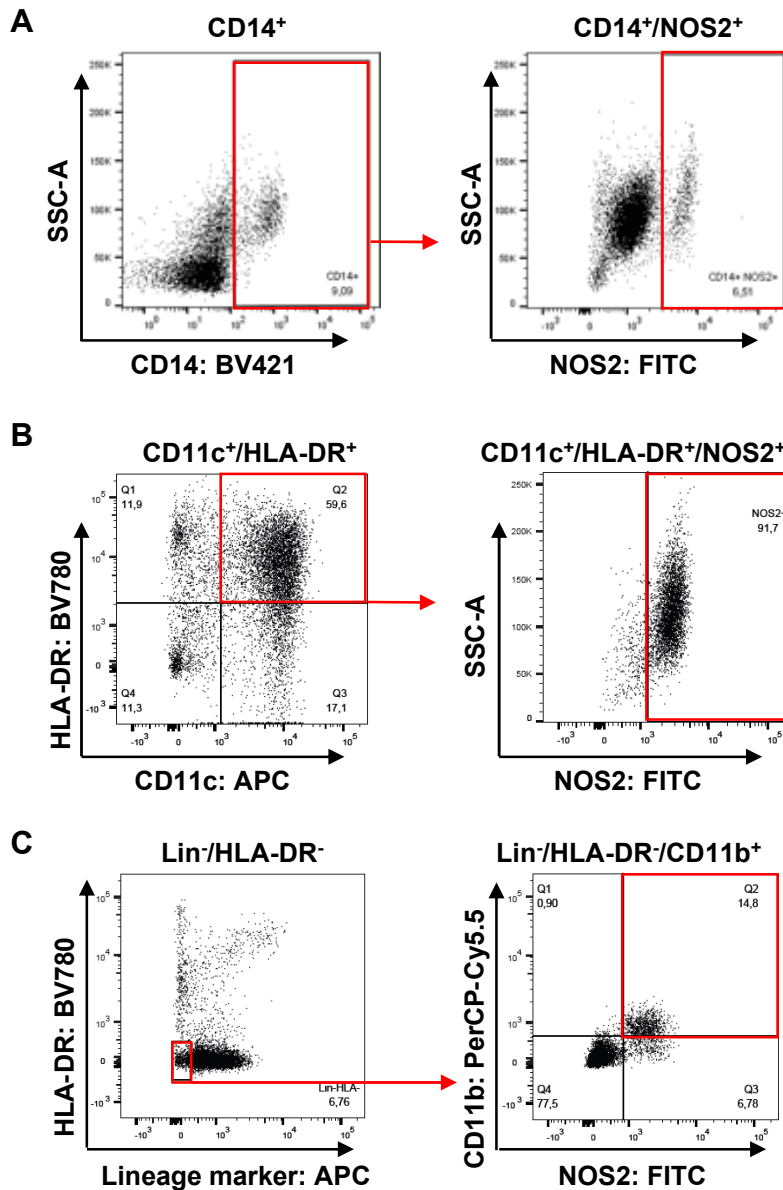

**fig. S1. Representative flow cytometry gating scheme for NOS2 expression analysis in human IFN- $\gamma$ /LPS-activated MDSCs and in vitro-differentiated TIP DCs.** (A) Gating scheme for NOS2 expression analysis in the *in vitro* activated CD14<sup>+</sup> subset of PBMCs: the whole cell population of PBMCs > single cells > living cells > CD14<sup>+</sup> > mean fluorescence intensity (MFI) of NOS2 expression was analyzed. (B) In vitro differentiated cells from a CD14 enriched PBMCs population. Gating scheme: the whole cell population > single cells > living cells > CD11c<sup>+</sup>/HLA-DR<sup>+</sup>/NOS2<sup>+</sup> > MFI of NOS2 expression was analyzed. (C) Gating scheme for NOS2 expression analysis in the *in vitro* activated MDSC-subset of PBMCs: the whole cell population of PBMCs > single cells > living cells > Lin<sup>-</sup>/HLA-DR<sup>-</sup>/CD11b<sup>+</sup> > mean fluorescence intensity (MFI) of NOS2 expression was analyzed.

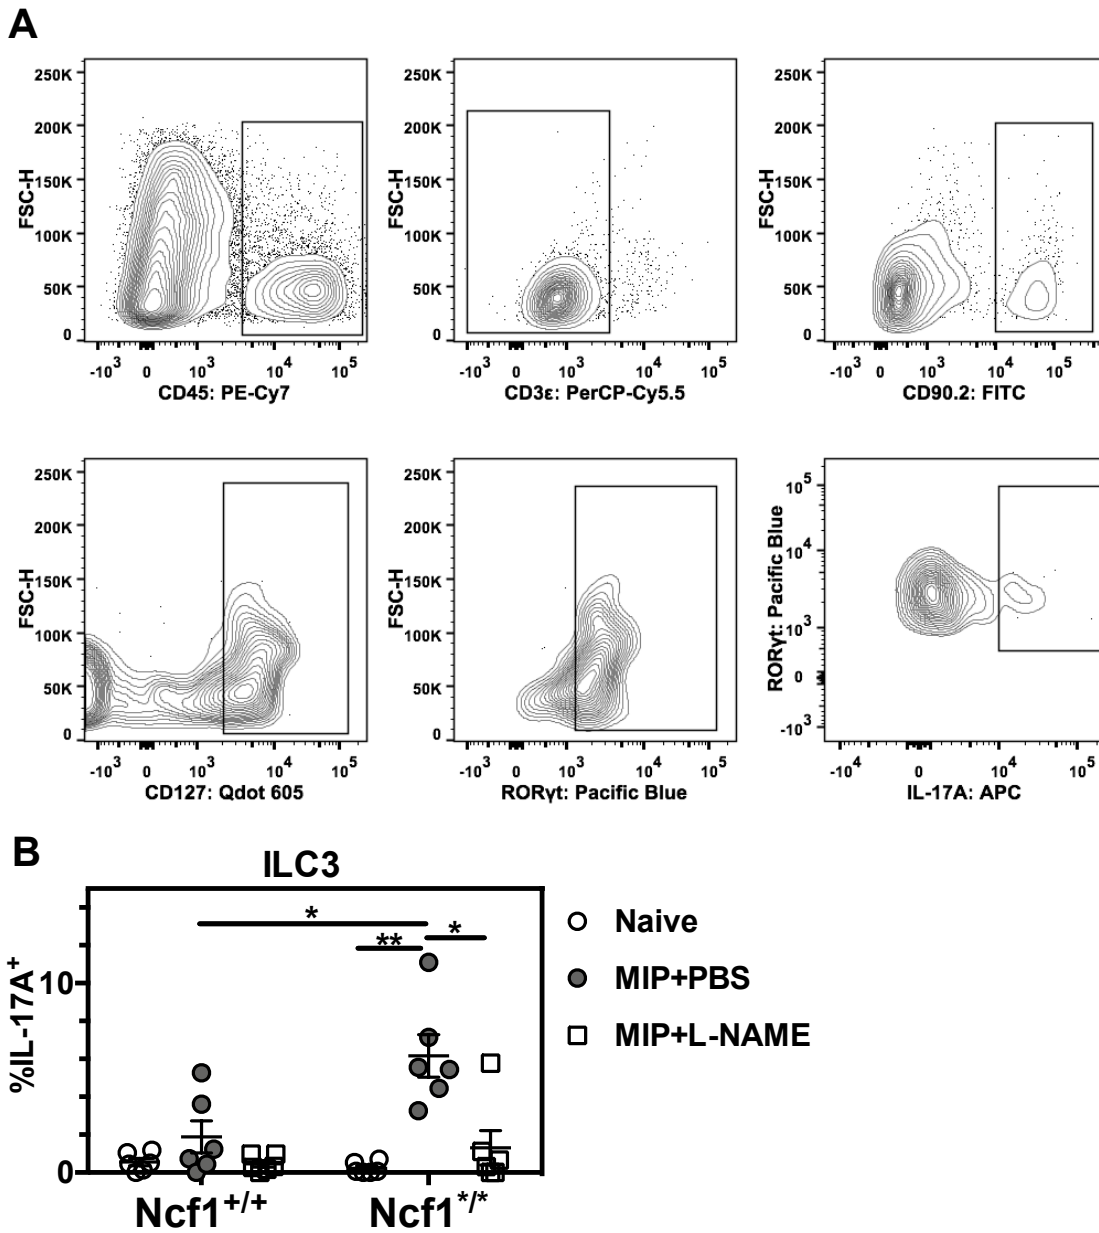

**fig. S2. Representative flow cytometry gating scheme for skin ILC3 analysis at the paw.** (A) Gating scheme for type 3 innate lymphoid cells ( $CD3^- CD90.2^+ CD127^+ ROR\gamma t^+ CD45^+$  live cells) (ILC3) analysis from the live single lymphocytes in the skin. (B) Frequency of  $IL-17A^+$  expression in ILC3 from the skin cells at the hind paws of  $Ncf1^{+/+}$  and  $Ncf1^{*/*}$  mice. Representative results are shown as mean  $\pm$  SEM from one of two independent experiments with the similar results.

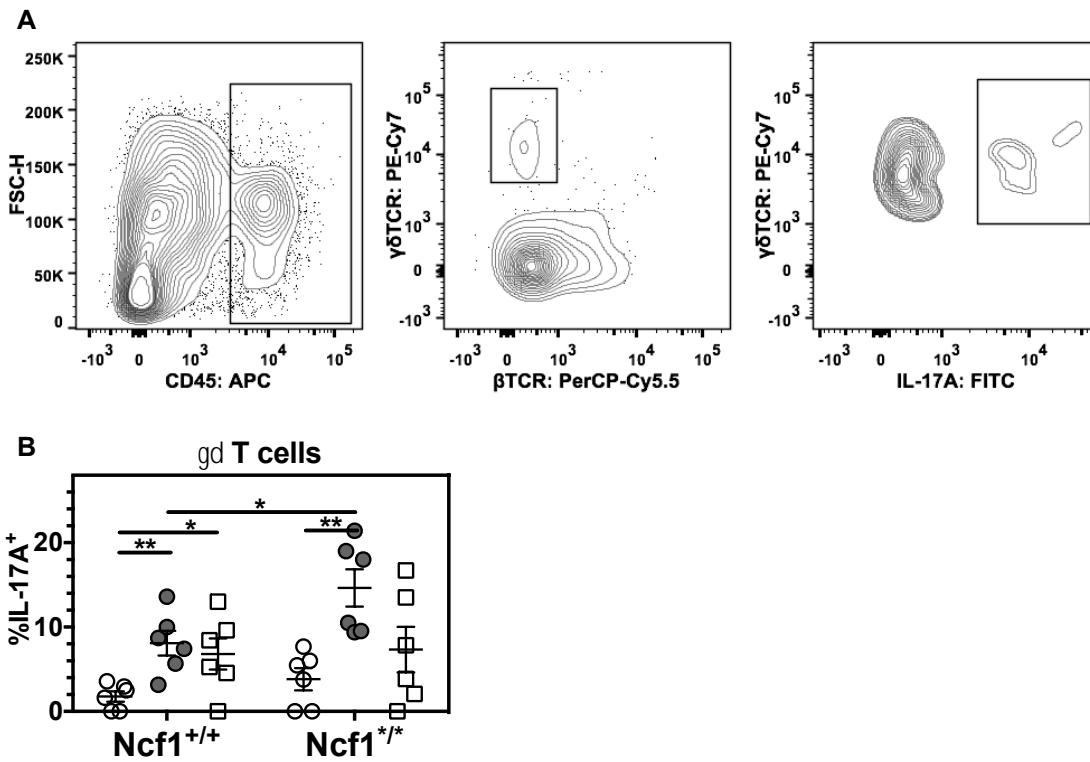

**fig. S3. Representative flow cytometry gating scheme for skin  $\gamma\delta$  T cells analysis at the paw.** (A) Gating scheme for  $\gamma\delta$ T cells ( $\gamma\delta$ TCR<sup>+</sup>  $\beta$ TCR<sup>-</sup>CD45<sup>+</sup> live cells) analysis from the live single lymphocytes in the skin. (B) Frequency of IL-17A<sup>+</sup> expression in  $\gamma\delta$ T cells from the skin cells at the hind paws of *Ncf1*<sup>+/+</sup> and *Ncf1*<sup>\*/\*</sup> mice. Representative results are shown as mean  $\pm$  SEM from one of two independent experiments with similar results.
